# Supplementary material
Source: PubMed Central journal article supplement (PMC4002930)
Supplement: cmi201137x1.pdf [file cmi201137x1.pdf]

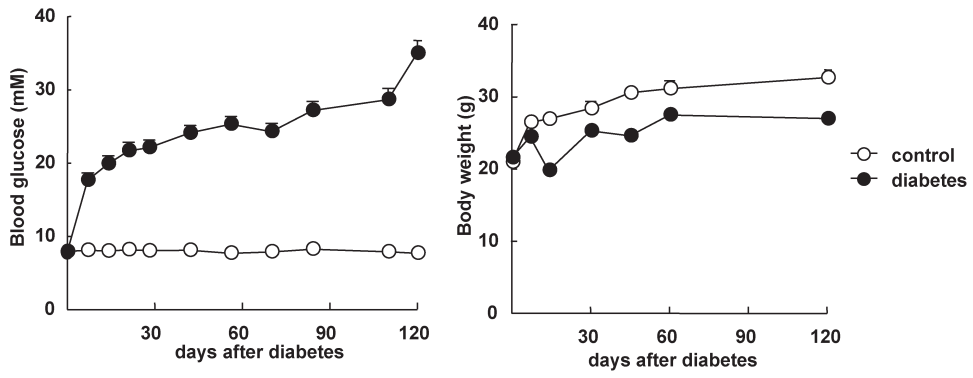

**Supplemental Figure 1** The blood glucose levels and body weight of control and STZ-induced diabetes mice. STZ, streptozotocin.

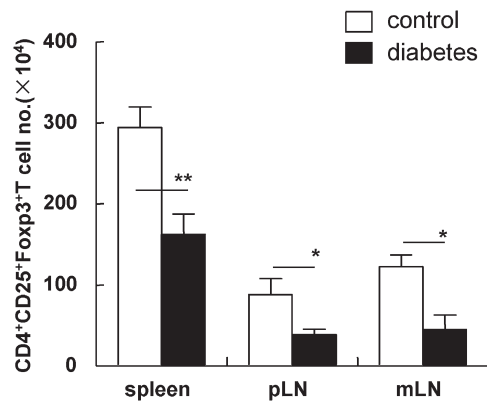

**Supplemental Figure 2** The total cell number of CD4<sup>+</sup>CD25<sup>+</sup>Foxp3<sup>+</sup> Tregs in spleens, pLNs and mLNs of control mice and mice with STZ-induced diabetes for 4 months. mLN, mesenteric lymph node; pLN, peripheral lymph node; STZ, streptozotocin; Treg, regulatory T cell.

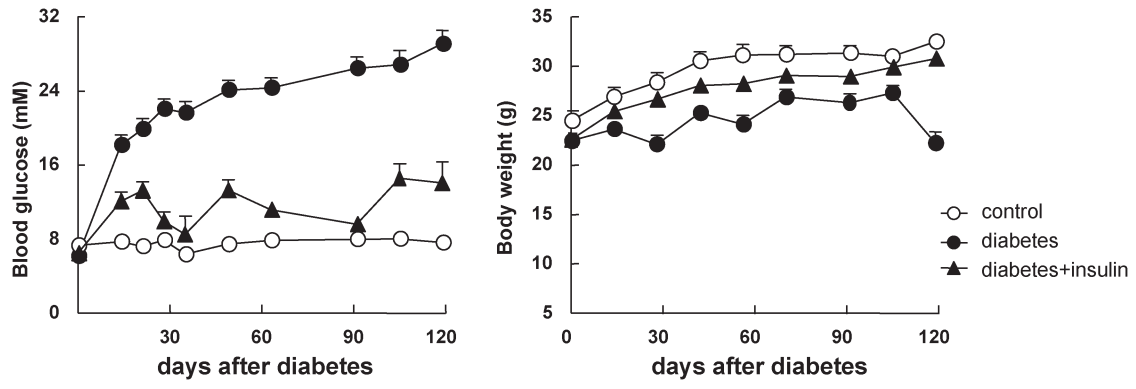

**Supplemental Figure 3** The blood glucose levels and body weight of control and STZ-induced diabetes mice treated with insulin or not. STZ, streptozotocin.
